# Supplementary material for: A Pb-free Sn–Bi alloy mount preparation method for secondary ion mass spectrometry (SIMS) analyses
Source: Royal Society of Chemistry journal article supplement (doi:10.1039/d4ja00252k), 2024-01-01
Supplement: d4ja00252k1.pdf [file d4ja00252k1.pdf]

Table S1 Oxygen isotopes analysis result

|                        | I.P. <sup>16</sup> O/Coeff |           | <sup>18</sup> O/Coeff |         | <sup>18</sup> O/ <sup>16</sup> O |           | Stage position (μm) |          | Field ap. (digits) |          | $\delta^{18}\text{O}$ |      |      |
|------------------------|----------------------------|-----------|-----------------------|---------|----------------------------------|-----------|---------------------|----------|--------------------|----------|-----------------------|------|------|
|                        | <i>nA</i>                  | <i>LI</i> | <i>HI</i>             |         | <i>HI/LI</i>                     |           | <i>x</i>            | <i>y</i> | <i>x</i>           | <i>y</i> |                       |      |      |
| Randomly selected spot |                            |           |                       |         |                                  |           |                     |          |                    |          |                       |      |      |
| Penglai1-01            | 1.53                       | 1.63E+09  | 0.021                 | 3280263 | 0.023                            | 0.0020149 | 0.007               | -5381    | 126                | -146     | 89                    | 5.62 | 0.04 |
| Penglai1-02            | 1.54                       | 1.61E+09  | 0.050                 | 3245907 | 0.047                            | 0.0020140 | 0.009               | -5301    | 115                | -143     | 90                    | 5.14 | 0.05 |
| Penglai1-03            | 1.55                       | 1.60E+09  | 0.028                 | 3215286 | 0.029                            | 0.0020134 | 0.007               | -5231    | 108                | -144     | 90                    | 4.84 | 0.03 |
| Penglai1-04            | 1.61                       | 1.61E+09  | 0.015                 | 3239643 | 0.019                            | 0.0020147 | 0.008               | -4691    | 226                | -138     | 90                    | 5.51 | 0.04 |
| Penglai1-05            | 1.53                       | 1.62E+09  | 0.019                 | 3262336 | 0.023                            | 0.0020145 | 0.008               | -4624    | 228                | -138     | 89                    | 5.39 | 0.04 |
| Penglai1-06            | 1.54                       | 1.60E+09  | 0.052                 | 3228115 | 0.053                            | 0.0020139 | 0.007               | -4562    | 218                | -137     | 89                    | 5.09 | 0.04 |
| Penglai1-07            | 1.52                       | 1.62E+09  | 0.020                 | 3260193 | 0.024                            | 0.0020142 | 0.009               | -4118    | 166                | -135     | 88                    | 5.27 | 0.05 |
| Penglai1-08            | 1.52                       | 1.60E+09  | 0.034                 | 3212846 | 0.038                            | 0.0020138 | 0.011               | -4019    | 185                | -134     | 90                    | 5.06 | 0.06 |
| Penglai1-09            | 1.52                       | 1.60E+09  | 0.012                 | 3218575 | 0.013                            | 0.0020137 | 0.007               | -3942    | 170                | -134     | 89                    | 5.00 | 0.03 |
| Penglai1-10            | 1.51                       | 1.61E+09  | 0.021                 | 3246688 | 0.024                            | 0.0020149 | 0.007               | -3387    | 133                | -125     | 89                    | 5.61 | 0.04 |
| Penglai1-11            | 1.52                       | 1.59E+09  | 0.015                 | 3206760 | 0.016                            | 0.0020137 | 0.007               | -3316    | 166                | -125     | 90                    | 5.00 | 0.04 |
| Penglai1-12            | 1.53                       | 1.58E+09  | 0.019                 | 3191541 | 0.016                            | 0.0020136 | 0.010               | -3235    | 121                | -123     | 90                    | 4.95 | 0.05 |
| Penglai1-13            | 1.51                       | 1.60E+09  | 0.024                 | 3228388 | 0.022                            | 0.0020139 | 0.011               | -2701    | 228                | -114     | 88                    | 5.10 | 0.06 |
| Penglai1-14            | 1.52                       | 1.61E+09  | 0.019                 | 3243413 | 0.021                            | 0.0020143 | 0.010               | -2763    | 180                | -116     | 88                    | 5.29 | 0.05 |
| Penglai1-15            | 1.51                       | 1.59E+09  | 0.020                 | 3192342 | 0.020                            | 0.0020140 | 0.007               | -2624    | 258                | -114     | 89                    | 5.14 | 0.04 |
| Penglai1-16            | 1.50                       | 1.58E+09  | 0.032                 | 3186681 | 0.034                            | 0.0020145 | 0.016               | -2008    | 226                | -106     | 89                    | 5.39 | 0.09 |
| Penglai1-17            | 1.49                       | 1.59E+09  | 0.029                 | 3201549 | 0.030                            | 0.0020142 | 0.011               | -1941    | 173                | -106     | 88                    | 5.25 | 0.06 |
| Penglai1-18            | 1.50                       | 1.61E+09  | 0.012                 | 3236000 | 0.015                            | 0.0020146 | 0.010               | -1956    | 101                | -106     | 86                    | 5.46 | 0.05 |
| Penglai1-19            | 1.49                       | 1.60E+09  | 0.022                 | 3224828 | 0.024                            | 0.0020146 | 0.011               | -1181    | 194                | -95      | 86                    | 5.46 | 0.06 |
| Penglai1-20            | 1.50                       | 1.58E+09  | 0.017                 | 3185828 | 0.022                            | 0.0020143 | 0.010               | -1112    | 219                | -94      | 88                    | 5.30 | 0.05 |
| Penglai1-21            | 1.50                       | 1.57E+09  | 0.014                 | 3168617 | 0.019                            | 0.0020138 | 0.009               | -1039    | 248                | -93      | 88                    | 5.07 | 0.04 |
| Penglai1-22            | 1.50                       | 1.61E+09  | 0.034                 | 3241359 | 0.036                            | 0.0020142 | 0.008               | -457     | 59                 | -84      | 84                    | 5.25 | 0.04 |
| Penglai1-23            | 1.49                       | 1.59E+09  | 0.023                 | 3201422 | 0.057                            | 0.0020148 | 0.051               | -383     | 121                | -82      | 86                    | 5.57 | 0.28 |
| Penglai1-24            | 1.50                       | 1.60E+09  | 0.026                 | 3218535 | 0.032                            | 0.0020139 | 0.010               | -230     | 98                 | -81      | 86                    | 5.13 | 0.05 |
| Penglai1-25            | 1.49                       | 1.59E+09  | 0.016                 | 3192647 | 0.016                            | 0.0020145 | 0.007               | 272      | 175                | -73      | 86                    | 5.39 | 0.04 |
| Penglai1-26            | 1.48                       | 1.58E+09  | 0.039                 | 3183047 | 0.034                            | 0.0020139 | 0.008               | 342      | 172                | -73      | 86                    | 5.10 | 0.04 |
| Penglai1-27            | 1.48                       | 1.57E+09  | 0.022                 | 3156242 | 0.027                            | 0.0020142 | 0.011               | 413      | 168                | -72      | 86                    | 5.26 | 0.06 |
| Penglai1-28            | 1.48                       | 1.58E+09  | 0.023                 | 3178585 | 0.026                            | 0.0020146 | 0.009               | 1054     | 118                | -61      | 84                    | 5.46 | 0.05 |
| Penglai1-29            | 1.47                       | 1.58E+09  | 0.010                 | 3187586 | 0.011                            | 0.0020144 | 0.009               | 1111     | 134                | -61      | 85                    | 5.37 | 0.05 |
| Penglai1-30            | 1.48                       | 1.56E+09  | 0.040                 | 3148068 | 0.043                            | 0.0020141 | 0.009               | 1156     | 167                | -59      | 84                    | 5.20 | 0.04 |
| Penglai1-31            | 1.47                       | 1.57E+09  | 0.027                 | 3164134 | 0.028                            | 0.0020142 | 0.011               | 1805     | 157                | -49      | 84                    | 5.27 | 0.06 |
| Penglai1-32            | 1.47                       | 1.56E+09  | 0.017                 | 3141333 | 0.012                            | 0.0020142 | 0.009               | 1889     | 200                | -48      | 85                    | 5.26 | 0.05 |
| Penglai1-33            | 1.48                       | 1.55E+09  | 0.016                 | 3116996 | 0.015                            | 0.0020134 | 0.007               | 1985     | 242                | -47      | 85                    | 4.84 | 0.03 |
| Penglai1-34            | 1.46                       | 1.59E+09  | 0.027                 | 3202469 | 0.026                            | 0.0020139 | 0.011               | 2591     | 287                | -37      | 83                    | 5.12 | 0.05 |
| Penglai1-35            | 1.46                       | 1.54E+09  | 0.023                 | 3091508 | 0.039                            | 0.0020132 | 0.013               | 2706     | 319                | -36      | 86                    | 4.77 | 0.06 |
| Penglai1-36            | 1.47                       | 1.57E+09  | 0.015                 | 3155834 | 0.013                            | 0.0020138 | 0.007               | 2717     | 237                | -37      | 83                    | 5.08 | 0.04 |
| Penglai1-37            | 1.46                       | 1.56E+09  | 0.021                 | 3146834 | 0.028                            | 0.0020136 | 0.011               | 3360     | 358                | -26      | 83                    | 4.96 | 0.05 |
| Penglai1-38            | 1.47                       | 1.54E+09  | 0.022                 | 3102007 | 0.028                            | 0.0020136 | 0.011               | 3457     | 381                | -24      | 84                    | 4.96 | 0.05 |
| Penglai1-39            | 1.47                       | 1.58E+09  | 0.034                 | 3177402 | 0.037                            | 0.0020134 | 0.009               | 3362     | 238                | -27      | 82                    | 4.86 | 0.05 |
| Penglai1-40            | 1.45                       | 1.54E+09  | 0.039                 | 3109142 | 0.044                            | 0.0020140 | 0.008               | 4041     | 313                | -15      | 83                    | 5.14 | 0.04 |
| Penglai1-41            | 1.41                       | 1.53E+09  | 0.017                 | 3074297 | 0.019                            | 0.0020138 | 0.007               | 4136     | 289                | -14      | 82                    | 5.07 | 0.04 |
| Penglai1-42            | 1.41                       | 1.49E+09  | 0.027                 | 2993580 | 0.030                            | 0.0020131 | 0.008               | 4217     | 358                | -14      | 84                    | 4.72 | 0.04 |
| Penglai1-43            | 1.40                       | 1.51E+09  | 0.030                 | 3046348 | 0.031                            | 0.0020138 | 0.009               | 4886     | 314                | -3       | 81                    | 5.06 | 0.04 |
| Penglai1-44            | 1.39                       | 1.51E+09  | 0.017                 | 3035541 | 0.015                            | 0.0020136 | 0.009               | 4978     | 348                | -2       | 82                    | 4.95 | 0.05 |

|             |      |          |       |         |       |           |       |      |     |    |    |      |      |
|-------------|------|----------|-------|---------|-------|-----------|-------|------|-----|----|----|------|------|
| Penglai1-45 | 1.39 | 1.47E+09 | 0.009 | 2954771 | 0.010 | 0.0020134 | 0.007 | 5025 | 437 | -1 | 85 | 4.86 | 0.04 |
| Penglai1-46 | 1.38 | 1.47E+09 | 0.023 | 2960654 | 0.018 | 0.0020133 | 0.007 | 5533 | 461 | 8  | 83 | 4.82 | 0.04 |
| Penglai1-47 | 1.39 | 1.47E+09 | 0.019 | 2963386 | 0.019 | 0.0020132 | 0.013 | 5569 | 395 | 7  | 82 | 4.75 | 0.06 |
| Penglai1-48 | 1.39 | 1.50E+09 | 0.008 | 3022684 | 0.010 | 0.0020131 | 0.008 | 5591 | 324 | 8  | 80 | 4.69 | 0.04 |
| Penglai1-58 | 1.35 | 1.48E+09 | 0.019 | 2987174 | 0.028 | 0.0020139 | 0.013 | 6938 | 525 | 30 | 79 | 5.11 | 0.06 |
| Penglai1-59 | 1.35 | 1.46E+09 | 0.018 | 2948052 | 0.019 | 0.0020136 | 0.007 | 6995 | 551 | 30 | 79 | 4.97 | 0.04 |
| Penglai1-60 | 1.36 | 1.45E+09 | 0.022 | 2912860 | 0.023 | 0.0020130 | 0.012 | 7061 | 537 | 30 | 79 | 4.64 | 0.06 |

Shard-1

|             |      |          |       |         |       |           |       |      |     |     |    |      |      |
|-------------|------|----------|-------|---------|-------|-----------|-------|------|-----|-----|----|------|------|
| Penglai2-01 | 1.35 | 1.40E+09 | 0.029 | 2829704 | 0.037 | 0.0020143 | 0.030 | 1785 | 857 | -42 | 88 | 5.30 | rim  |
| Penglai2-02 | 1.34 | 1.43E+09 | 0.051 | 2890669 | 0.052 | 0.0020146 | 0.009 | 1835 | 857 | -44 | 87 | 5.44 | rim  |
| Penglai2-03 | 1.35 | 1.42E+09 | 0.060 | 2870260 | 0.083 | 0.0020147 | 0.015 | 1885 | 857 | -45 | 87 | 5.48 | core |
| Penglai2-04 | 1.33 | 1.43E+09 | 0.012 | 2876310 | 0.020 | 0.0020142 | 0.011 | 1935 | 857 | -43 | 88 | 5.26 | core |
| Penglai2-05 | 1.33 | 1.41E+09 | 0.024 | 2845597 | 0.021 | 0.0020139 | 0.007 | 1985 | 857 | -44 | 89 | 5.11 | core |
| Penglai2-06 | 1.33 | 1.43E+09 | 0.056 | 2881844 | 0.061 | 0.0020140 | 0.010 | 2035 | 857 | -43 | 88 | 5.14 | core |
| Penglai2-07 | 1.33 | 1.43E+09 | 0.015 | 2870861 | 0.016 | 0.0020141 | 0.009 | 2085 | 857 | -43 | 88 | 5.23 | core |
| Penglai2-08 | 1.33 | 1.43E+09 | 0.019 | 2889746 | 0.017 | 0.0020138 | 0.007 | 2135 | 857 | -42 | 88 | 5.07 | core |
| Penglai2-09 | 1.34 | 1.42E+09 | 0.059 | 2857496 | 0.060 | 0.0020137 | 0.010 | 2185 | 857 | -42 | 88 | 5.02 | core |
| Penglai2-10 | 1.33 | 1.42E+09 | 0.029 | 2856603 | 0.032 | 0.0020137 | 0.007 | 2235 | 857 | -41 | 87 | 5.03 | core |
| Penglai2-11 | 1.33 | 1.40E+09 | 0.023 | 2809907 | 0.030 | 0.0020131 | 0.009 | 2269 | 856 | -41 | 88 | 4.71 | rim  |
| Penglai2-12 | 1.32 | 1.36E+09 | 0.009 | 2744470 | 0.012 | 0.0020143 | 0.011 | 1944 | 898 | -43 | 90 | 5.33 | rim  |
| Penglai2-13 | 1.32 | 1.36E+09 | 0.052 | 2731522 | 0.059 | 0.0020140 | 0.009 | 2002 | 925 | -42 | 90 | 5.16 | rim  |
| Penglai2-14 | 1.32 | 1.35E+09 | 0.036 | 2712209 | 0.037 | 0.0020140 | 0.014 | 2061 | 950 | -42 | 91 | 5.15 | rim  |
| Penglai2-15 | 1.32 | 1.35E+09 | 0.010 | 2725470 | 0.014 | 0.0020139 | 0.008 | 2118 | 974 | -42 | 90 | 5.10 | rim  |
| Penglai2-16 | 1.32 | 1.36E+09 | 0.032 | 2747802 | 0.030 | 0.0020136 | 0.009 | 2182 | 993 | -39 | 90 | 4.97 | rim  |
| Penglai2-17 | 1.32 | 1.38E+09 | 0.021 | 2785731 | 0.025 | 0.0020134 | 0.008 | 2219 | 961 | -40 | 89 | 4.87 | rim  |
| Penglai2-18 | 1.32 | 1.41E+09 | 0.069 | 2842547 | 0.067 | 0.0020130 | 0.015 | 2241 | 917 | -40 | 90 | 4.65 | rim  |
| Penglai2-19 | 1.32 | 1.39E+09 | 0.017 | 2805282 | 0.020 | 0.0020125 | 0.008 | 2286 | 803 | -40 | 86 | 4.40 | rim  |
| Penglai2-20 | 1.32 | 1.41E+09 | 0.025 | 2838031 | 0.027 | 0.0020131 | 0.007 | 2302 | 751 | -41 | 85 | 4.69 | rim  |
| Penglai2-21 | 1.33 | 1.42E+09 | 0.016 | 2853893 | 0.017 | 0.0020130 | 0.008 | 2313 | 702 | -42 | 85 | 4.64 | rim  |
| Penglai2-22 | 1.33 | 1.44E+09 | 0.014 | 2894930 | 0.014 | 0.0020131 | 0.008 | 2305 | 652 | -41 | 84 | 4.73 | rim  |
| Penglai2-23 | 1.32 | 1.46E+09 | 0.023 | 2948221 | 0.032 | 0.0020135 | 0.009 | 2240 | 614 | -42 | 82 | 4.89 | rim  |
| Penglai2-24 | 1.31 | 1.48E+09 | 0.006 | 2977347 | 0.010 | 0.0020142 | 0.007 | 2167 | 621 | -43 | 81 | 5.26 | rim  |
| Penglai2-25 | 1.31 | 1.49E+09 | 0.012 | 2991812 | 0.017 | 0.0020146 | 0.007 | 2083 | 613 | -43 | 81 | 5.48 | rim  |
| Penglai2-26 | 1.31 | 1.47E+09 | 0.032 | 2968945 | 0.032 | 0.0020142 | 0.007 | 1994 | 624 | -44 | 82 | 5.27 | rim  |
| Penglai2-27 | 1.31 | 1.46E+09 | 0.011 | 2937380 | 0.016 | 0.0020145 | 0.008 | 1913 | 638 | -45 | 83 | 5.39 | rim  |
| Penglai2-28 | 1.31 | 1.45E+09 | 0.175 | 2923091 | 0.186 | 0.0020152 | 0.011 | 1866 | 683 | -45 | 83 | 5.75 | rim  |
| Penglai2-29 | 1.30 | 1.42E+09 | 0.013 | 2861374 | 0.020 | 0.0020158 | 0.011 | 1849 | 731 | -45 | 86 | 6.05 | rim  |
| Penglai2-30 | 1.29 | 1.42E+09 | 0.025 | 2852245 | 0.025 | 0.0020150 | 0.015 | 1826 | 790 | -44 | 85 | 5.67 | rim  |
| Penglai2-31 | 1.28 | 1.36E+09 | 0.031 | 2744597 | 0.033 | 0.0020136 | 0.008 | 2170 | 938 | -41 | 89 | 4.96 | core |
| Penglai2-32 | 1.28 | 1.37E+09 | 0.014 | 2761883 | 0.017 | 0.0020135 | 0.008 | 2196 | 894 | -42 | 88 | 4.93 | core |
| Penglai2-33 | 1.28 | 1.39E+09 | 0.007 | 2796848 | 0.011 | 0.0020141 | 0.007 | 2186 | 802 | -42 | 86 | 5.21 | core |
| Penglai2-34 | 1.28 | 1.40E+09 | 0.010 | 2817241 | 0.010 | 0.0020145 | 0.007 | 2186 | 752 | -43 | 86 | 5.40 | core |
| Penglai2-35 | 1.29 | 1.41E+09 | 0.010 | 2837996 | 0.015 | 0.0020135 | 0.012 | 2186 | 702 | -43 | 85 | 4.91 | core |
| Penglai2-36 | 1.28 | 1.44E+09 | 0.029 | 2898272 | 0.029 | 0.0020142 | 0.007 | 2203 | 654 | -43 | 81 | 5.26 | core |

Shard-2

|             |      |          |       |         |       |           |       |      |      |     |    |      |     |
|-------------|------|----------|-------|---------|-------|-----------|-------|------|------|-----|----|------|-----|
| Penglai3-01 | 1.28 | 1.42E+09 | 0.013 | 2854245 | 0.019 | 0.0020150 | 0.009 | 2376 | -129 | -43 | 81 | 5.65 | rim |
| Penglai3-02 | 1.27 | 1.40E+09 | 0.018 | 2828370 | 0.018 | 0.0020148 | 0.009 | 2427 | -100 | -43 | 83 | 5.56 | rim |
| Penglai3-03 | 1.27 | 1.39E+09 | 0.023 | 2807458 | 0.026 | 0.0020142 | 0.010 | 2491 | -85  | -43 | 83 | 5.27 | rim |

|             |      |          |       |         |       |           |       |      |      |     |    |      |      |
|-------------|------|----------|-------|---------|-------|-----------|-------|------|------|-----|----|------|------|
| Penglai3-04 | 1.27 | 1.38E+09 | 0.037 | 2779824 | 0.041 | 0.0020141 | 0.010 | 2556 | -71  | -42 | 82 | 5.22 | rim  |
| Penglai3-05 | 1.28 | 1.36E+09 | 0.027 | 2736979 | 0.030 | 0.0020142 | 0.010 | 2629 | -69  | -41 | 84 | 5.25 | rim  |
| Penglai3-06 | 1.27 | 1.36E+09 | 0.015 | 2746918 | 0.014 | 0.0020142 | 0.010 | 2704 | -49  | -41 | 84 | 5.28 | rim  |
| Penglai3-07 | 1.27 | 1.36E+09 | 0.042 | 2742107 | 0.044 | 0.0020140 | 0.010 | 2764 | -17  | -40 | 85 | 5.17 | rim  |
| Penglai3-08 | 1.27 | 1.37E+09 | 0.030 | 2750340 | 0.032 | 0.0020139 | 0.008 | 2823 | 2    | -40 | 85 | 5.13 | rim  |
| Penglai3-09 | 1.27 | 1.34E+09 | 0.021 | 2695497 | 0.022 | 0.0020132 | 0.009 | 2890 | 22   | -38 | 85 | 4.77 | rim  |
| Penglai3-10 | 1.28 | 1.36E+09 | 0.015 | 2734674 | 0.017 | 0.0020129 | 0.008 | 2913 | -36  | -39 | 83 | 4.61 | rim  |
| Penglai3-11 | 1.28 | 1.36E+09 | 0.015 | 2737191 | 0.018 | 0.0020129 | 0.012 | 2941 | -89  | -38 | 83 | 4.60 | rim  |
| Penglai3-12 | 1.28 | 1.39E+09 | 0.017 | 2790028 | 0.021 | 0.0020127 | 0.008 | 2964 | -143 | -37 | 81 | 4.52 | rim  |
| Penglai3-13 | 1.28 | 1.41E+09 | 0.013 | 2844662 | 0.019 | 0.0020127 | 0.011 | 2987 | -184 | -37 | 80 | 4.52 | rim  |
| Penglai3-14 | 1.27 | 1.44E+09 | 0.010 | 2890499 | 0.011 | 0.0020137 | 0.009 | 2920 | -211 | -39 | 78 | 5.00 | rim  |
| Penglai3-15 | 1.27 | 1.44E+09 | 0.008 | 2904310 | 0.011 | 0.0020144 | 0.008 | 2837 | -228 | -40 | 78 | 5.34 | rim  |
| Penglai3-16 | 1.27 | 1.45E+09 | 0.013 | 2927069 | 0.017 | 0.0020144 | 0.009 | 2763 | -242 | -41 | 77 | 5.35 | rim  |
| Penglai3-17 | 1.27 | 1.45E+09 | 0.011 | 2911215 | 0.011 | 0.0020138 | 0.009 | 2696 | -249 | -41 | 78 | 5.06 | rim  |
| Penglai3-18 | 1.27 | 1.44E+09 | 0.011 | 2908060 | 0.011 | 0.0020140 | 0.007 | 2628 | -256 | -42 | 78 | 5.16 | rim  |
| Penglai3-19 | 1.27 | 1.44E+09 | 0.022 | 2901708 | 0.024 | 0.0020143 | 0.007 | 2570 | -262 | -43 | 78 | 5.31 | rim  |
| Penglai3-20 | 1.27 | 1.45E+09 | 0.010 | 2922954 | 0.014 | 0.0020153 | 0.007 | 2510 | -275 | -43 | 78 | 5.79 | rim  |
| Penglai3-21 | 1.26 | 1.43E+09 | 0.026 | 2876012 | 0.030 | 0.0020152 | 0.007 | 2484 | -236 | -43 | 80 | 5.78 | rim  |
| Penglai3-22 | 1.26 | 1.41E+09 | 0.017 | 2843486 | 0.021 | 0.0020149 | 0.009 | 2458 | -200 | -43 | 80 | 5.60 | rim  |
| Penglai3-23 | 1.27 | 1.41E+09 | 0.010 | 2840703 | 0.014 | 0.0020148 | 0.007 | 2421 | -169 | -43 | 80 | 5.56 | rim  |
| Penglai3-24 | 1.26 | 1.41E+09 | 0.009 | 2840323 | 0.008 | 0.0020148 | 0.007 | 2482 | -164 | -44 | 80 | 5.53 | core |
| Penglai3-25 | 1.25 | 1.40E+09 | 0.010 | 2817209 | 0.018 | 0.0020142 | 0.010 | 2532 | -164 | -44 | 82 | 5.25 | core |
| Penglai3-26 | 1.25 | 1.39E+09 | 0.031 | 2806754 | 0.033 | 0.0020136 | 0.008 | 2582 | -164 | -45 | 82 | 4.97 | core |
| Penglai3-27 | 1.24 | 1.39E+09 | 0.028 | 2798134 | 0.033 | 0.0020141 | 0.010 | 2632 | -164 | -43 | 82 | 5.22 | core |
| Penglai3-28 | 1.24 | 1.39E+09 | 0.009 | 2799620 | 0.017 | 0.0020141 | 0.010 | 2682 | -164 | -43 | 82 | 5.21 | core |
| Penglai3-29 | 1.25 | 1.40E+09 | 0.007 | 2814535 | 0.010 | 0.0020142 | 0.008 | 2732 | -164 | -44 | 82 | 5.28 | core |
| Penglai3-30 | 1.25 | 1.39E+09 | 0.022 | 2805842 | 0.024 | 0.0020136 | 0.008 | 2782 | -164 | -42 | 82 | 4.96 | core |
| Penglai3-31 | 1.25 | 1.39E+09 | 0.017 | 2790956 | 0.019 | 0.0020133 | 0.009 | 2832 | -164 | -41 | 82 | 4.80 | core |
| Penglai3-32 | 1.25 | 1.39E+09 | 0.012 | 2802533 | 0.015 | 0.0020138 | 0.008 | 2882 | -164 | -40 | 81 | 5.07 | core |
| Penglai3-33 | 1.24 | 1.37E+09 | 0.005 | 2751415 | 0.012 | 0.0020140 | 0.008 | 2839 | -89  | -41 | 83 | 5.15 | core |

---
